# Supplementary material for: Axolotl Nanog activity in mouse embryonic stem cells demonstrates that ground state pluripotency is conserved from urodele amphibians to mammals
Source: Oxford University Press journal article supplement (doi:10.1242/dev.049262), 2010-08-24
Supplement: dev049262supptables1.pdf [file dev049262supptables1.pdf]

**Table S1. LIF-independent culture of *Nanog*-expressing ESCs**

| Long-term LIF withdrawal       | Standard passage | Longest passage without LIF |
|--------------------------------|------------------|-----------------------------|
| ESC                            | None             | P6*                         |
| Control                        | None             | P7*                         |
| Nanog                          | 1:5-1:10         | P42                         |
| Nanog $\Delta$ WR              | None             | P9*                         |
| Nanog::ZIP                     | 1:5              | P32                         |
| Nanog::FKBPv                   | 1:5              | P30                         |
| Nanog::FKBPv + 10 nM AP20187   | 1:5              | P37                         |
| NANOG                          | 1:5              | P39                         |
| axNanog                        | None             | P8*                         |
| axNanog::mWR                   | 1:5              | P29                         |
| axNanog::ZIP                   | 1:5              | P31                         |
| axNanog::FKBPv                 | 1:5              | P38                         |
| axNanog::FKBPv + 10 nM AP20187 | 1:5              | P38                         |

Details are shown of the passaging dilution and continuity of ESCs expressing *Nanog* cultured long-term without LIF.

\*Failure to passage after this point due to a lack of self-renewal.
